# Supplementary material for: Impact of the Regularization Parameter in the Mean Free Path Reconstruction Method: Nanoscale Heat Transport and Beyond
Source: MDPI journal article supplement (doi:10.3390/nano9030414), 2019-03-11
Supplement: s1 [file s1]

## Impact of the regularization parameter in the Mean Free Path reconstruction method: Nanoscale heat transport and beyond

M.A. Sánchez-Martínez,<sup>1</sup> F. Alzina,<sup>1</sup> J. Oyarzo,<sup>2</sup> C.M. Sotomayor-Torres,<sup>1,3</sup> and E. Chavez-Angel<sup>\*1</sup>

<sup>1</sup>) Catalan Institute of Nanoscience and Nanotechnology (ICN2), CSIC and The Barcelona Institute of Science and Technology (BIST), Campus UAB, Bellaterra, 08193 Barcelona, Spain.

<sup>2</sup>) Instituto de Química, Pontificia Universidad Católica de Valparaíso, Casilla 4059, Valparaíso, Chile.

<sup>3</sup>) ICREA- Institució Catalana de Recerca i Estudis Avançats, 08010 Barcelona, Spain.

\*Corresponding author: emigdio.chavez@icn2.cat

### Magnon-mediated longitudinal spin-Seebeck effect in YIG films

This data was obtained by Guo *et al* measuring the thickness dependence of the longitudinal-Spin Seebeck effect (LSSE) in YIG films.[1] The suppression function used in the reconstruction was the cross-plane Fuchs-Sondheimer model presented in Eq. (4). In **Figure S1a** it is easy to see that the different values of  $\mu$  have an impact mainly in the accumulation function, being the case of the lower value of  $\mu$  that affects the most both the accumulation function and the recovered LSSE, as shown in **Figure S1b**. The reconstructed function for the optimal value  $\mu_{\text{opt}} = 0.8856$  at  $T=250$  K is shown in Fig. 10. The optimal value of the reconstruction parameter was calculated for all the temperatures measured, obtaining a different value for each of them (see **Figure S2**).

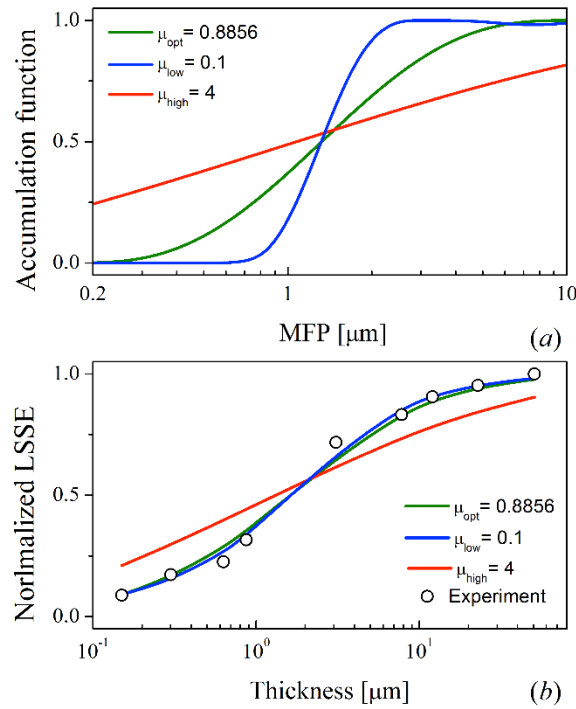

**Figure S1 (a)** Magnon mean free path distribution of the accumulation function reconstructed for  $m_{\text{opt}}$  (green line) for spin Seebeck effect experiments. The blue and red lines are the result obtained using a low and high value of  $m$ , respectively. **(b)** Normalized Longitudinal Spin-Seebeck coefficient for different thickness of the YIG sample. [1]

## Supporting information

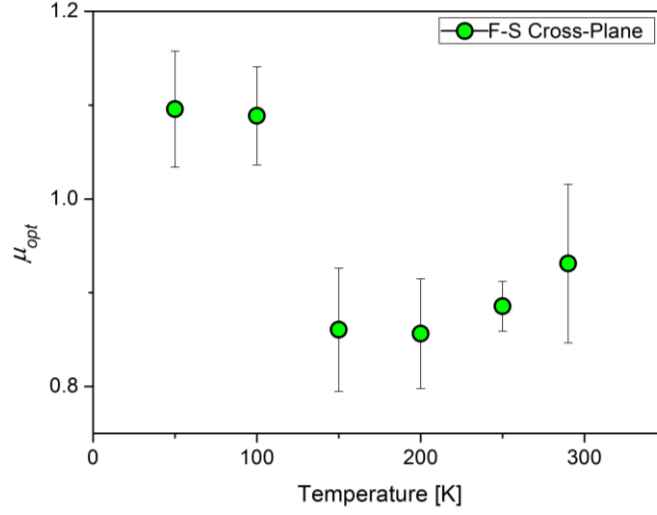

**Figure S2** Optimal values of  $\mu$  for the Magnon-MFP reconstruction at different temperatures for LSSE experiments.

### Spin diffusion length in Pt films

This case is an example of the application of this technique to a completely different transport phenomena, namely, the spin diffusion length. The experiment consisted of measuring the thickness dependence of the spin-Hall torque coefficient,  $\xi$ , in platinum.[2]

In this case, the suppression function is derived from the drift-diffusion model [3], and given by [4]

$$S(\chi) = 1 - \frac{1}{\sinh(1/\chi)} \quad (S1)$$

This case differs from the previous phenomena, having a narrow span of the MFP distribution. For the optimal value of  $\mu$ , the accumulation function's range goes from around 0.7 to 2 nm, and for  $\mu = 0.1$  it shrinks to be from 1 to 2 nm (see Figure S3). This indicates that the method is very sensitive even for very narrow MFP distributions, which allows it to be applied to a wide range of transport phenomena.

## Supporting information

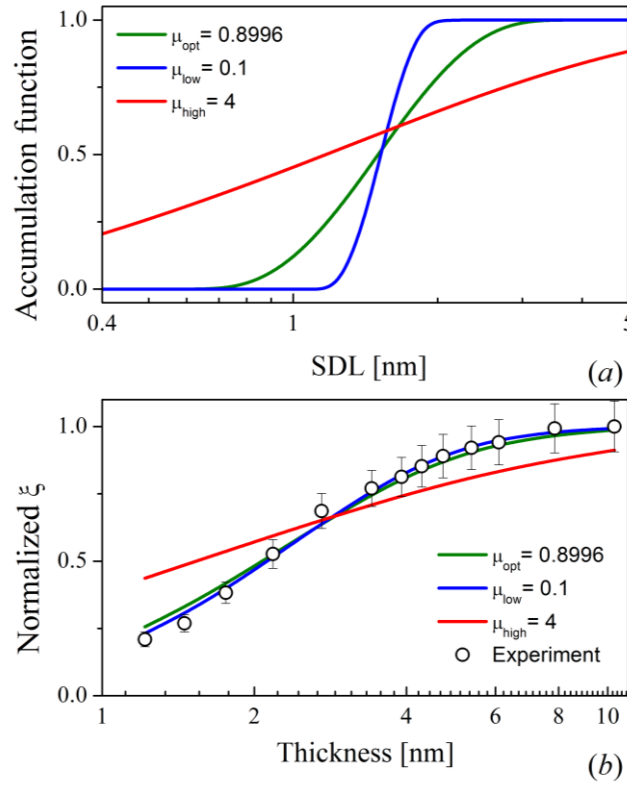

**Figure S3** Spin diffusion length distribution of the accumulation function reconstructed for spin-Hall torque experiments. The blue and red lines are the result obtained using a low and high value of  $\mu$ , respectively. The green line represent the MFP distribution reconstructed using  $\mu_{\text{opt}}$ . (b) Normalized Longitudinal spin-Hall torque coefficient for different thickness of the Pt film values of  $\mu$  for the Magnon-MFP reconstruction at different temperatures for LSSE experiments.

## References

- [1] E.-J. Guo, J. Cramer, A. Kehlberger, C.A. Ferguson, D.A. MacLaren, G. Jakob et al., "Influence of thickness and interface on the low-temperature enhancement of the spin Seebeck effect in YIG films", Phys. Rev. X, vol. 6, no. 3, pp. 31012, 2016. DOI: 10.1103/PhysRevX.6.031012.
- [2] M.-H. Nguyen, D.C. Ralph and R.A. Buhrman, "Spin torque study of the spin Hall conductivity and spin diffusion length in platinum thin films with varying resistivity", Phys. Rev. Lett., vol. 116, no. 12, pp. 126601, 2016. DOI: 10.1103/PhysRevLett.116.126601.
- [3] P.M. Haney, H.-W. Lee, K.-J. Lee, A. Manchon and M.D. Stiles, "Current induced torques and interfacial spin-orbit coupling: Semiclassical modeling", Phys. Rev. B, vol. 87, no. 17, pp. 174411, 2013. DOI: 10.1103/PhysRevB.87.174411.
- [4] A. Kehlberger, U. Ritzmann, D. Hinzke, E.-J. Guo, J. Cramer, G. Jakob et al., "Length scale of the spin Seebeck effect", Phys. Rev. Lett., vol. 115, no. 9, pp. 96602, 2015. DOI: 10.1103/PhysRevLett.115.096602.
